# Supplementary material
Source: PubMed Central journal article supplement (PMC8695384)
Supplement: mmc1.pdf [file mmc1.pdf]

# THE LANCET

## Infectious Diseases

### Supplementary appendix

This appendix formed part of the original submission and has been peer reviewed. We post it as supplied by the authors.

Supplement to: Antonelli M, Penfold RS, Merino J. Risk factors and disease profile of post-vaccination SARS-CoV-2 infection in UK users of the COVID Symptom Study app: a prospective, community-based, nested, case-control study. *Lancet Infect Dis* 2021; published online September 1. [https://doi.org/10.1016/S1473-3099\(21\)00460-6](https://doi.org/10.1016/S1473-3099(21)00460-6).

**Supplementary Table 1. List of self-reported symptoms and corresponding questions used in the reporting app.**

| Symptoms                       | Questions                                                                                                            |
|--------------------------------|----------------------------------------------------------------------------------------------------------------------|
| Fever                          | Do you have a fever or feel too hot?                                                                                 |
| Chills or shivers              | Do you feel chills or shivers (feel too cold)?                                                                       |
| Persistent cough               | Persistent cough (coughing a lot for more than an hour or 3 or more coughing episodes in 24 hours)                   |
| Fatigue                        | Are you experiencing unusual fatigue?                                                                                |
| Shortness of breath            | Shortness of breath or trouble breathing                                                                             |
| Loss of smell                  | Loss of smell / taste                                                                                                |
| Hoarse voice                   | Unusually hoarse voice                                                                                               |
| Chest pain                     | Unusual chest pain or tightness in your chest                                                                        |
| Abdominal pain                 | Unusual abdominal pain or stomach ache                                                                               |
| Diarrhoea                      | Diarrhoea                                                                                                            |
| Delirium or reported confusion | Confusion, disorientation or drowsiness                                                                              |
| Eye soreness                   | Do your eyes have any unusual eye-soreness or discomfort (e.g. light sensitivity, excessive tears, or pink/red eye)? |
| Skipped meals                  | Skipping meals                                                                                                       |
| Headache                       | Headache                                                                                                             |
| Nausea                         | Nausea or vomiting                                                                                                   |
| Dizziness/ lightheadedness     | Dizziness or light-headedness                                                                                        |
| Sore throat                    | Sore or painful throat                                                                                               |
| Unusual muscle pains           | Unusual strong muscle pains or aches                                                                                 |
| Red welts on face or lips      | Raised, red, itchy welts on the skin or sudden swelling of the face or lips                                          |
| Blisters on feet               | Red/purple sores or blisters on your feet, including your toes                                                       |
| Typical hayfever               | Increase in your usual allergy symptoms                                                                              |
| Rash                           | Rash on your arms or torso                                                                                           |
| Sensation of skin burning      | Strange, unpleasant sensations in your skin like “pins & needles” or burning                                         |
| Hair loss                      | Unusual hair loss                                                                                                    |
| Low mood                       | Feeling down, depressed or hopeless                                                                                  |
| Brain fog                      | Loss of concentration or memory (brain fog)                                                                          |
| Runny nose                     | Runny nose                                                                                                           |
| Sneezing                       | Sneezing more than usual                                                                                             |
| Earache                        | Earache                                                                                                              |
| Tinnitus                       | Ringing in your ears                                                                                                 |
| Swollen glands                 | Swollen neck glands                                                                                                  |
| Irregular heartbeat            | Unusually fast or irregular heartbeat (palpitations)                                                                 |

**Supplementary Table 2. Number and proportion of type of tests performed by cases testing positive and controls testing negatives after the first and second dose**

|    | Cases-1-Cases-2<br>n=6030 (D1)<br>n=2370 (D2) |                           |               | Controls-1-Controls-2<br>n=6030 (D1)<br>n=2370 (D2) |                           |               |
|----|-----------------------------------------------|---------------------------|---------------|-----------------------------------------------------|---------------------------|---------------|
|    | RT-PCR confirmed tests n(%)                   | LFAT confirmed tests n(%) | Not sure n(%) | RT-PCR confirmed tests n(%)                         | LFAT confirmed tests n(%) | Not sure n(%) |
| D1 | 4,200(70%)                                    | 1,583(26%)                | 247(4%)       | 4,556(76%)                                          | 1,391(23%)                | 83(1%)        |
| D2 | 1,570(66%)                                    | 746(31%)                  | 54(3%)        | 2,020(85%)                                          | 338(14%)                  | 12(1%)        |

n=number of individuals; D1=After first dose; D2=After second dose; Cases-1=cases infected after the first dose but before the second dose of the vaccine; Cases-2=cases infected after the second dose of the vaccine; Controls-1 and Controls-2=vaccinated users tested negative after first and second dose matched with Cases-1 and Cases-2, respectively.

**Supplementary Table 3. Multivariate analysis of age and body mass index (BMI), adjusted by sex.**

|             |    | All age groups |              |         | Younger adults (18-59 years) |             |         | Older adults (60+ years) |             |         |
|-------------|----|----------------|--------------|---------|------------------------------|-------------|---------|--------------------------|-------------|---------|
|             |    | OR             | 95% CI       | p-value | OR                           | 95% CI      | p-value | OR                       | 95% CI      | p-value |
| BMI         | D1 | 1.00           | [1.00-1.01]  | 0.023   | 1.00                         | [1.00-1.01] | 0.22    | 1.01                     | [1.00-1.02] | 0.037   |
|             | D2 | 1.00           | [0.99-1.00]  | 0.81    | 1.00                         | [0.99-1.01] | 0.88    | 1.00                     | [0.99-1.02] | 0.69    |
| Age (years) | D1 | 0.99           | [0.99- 1.00] | <0.0001 | 0.98                         | [0.98-0.98] | <0.0001 | 0.94                     | [0.93-0.95] | <0.0001 |
|             | D2 | 0.99           | [0.99-0.99]  | <0.0001 | 0.97                         | [0.96-0.98] | <0.0001 | 0.93                     | [0.92-0.95] | <0.0001 |

OR = Odds ratio; CI = Confidence interval; BMI = Body mass index; D1=After first dose; D2=After second dose

**Supplementary Table 4. Univariate analysis of frailty status and each comorbidity, adjusted by age, BMI, and sex.**

|                |    | All age groups |             |         | Younger adults (18-59 years) |             |         | Older adults (60+ years) |             |         |
|----------------|----|----------------|-------------|---------|------------------------------|-------------|---------|--------------------------|-------------|---------|
|                |    | OR             | 95% CI      | P-value | OR                           | 95% CI      | p-value | OR                       | 95% CI      | p-value |
| frailty        | D1 | 0.95           | [0.80-1.14] | 0.61    | 0.71                         | [0.52-0.97] | 0.029   | 1.93                     | [1.50-2.48] | <0.0001 |
|                | D2 | 0.80           | [0.60-1.06] | 0.12    | 0.68                         | [0.42-1.09] | 0.106   | 1.14                     | [0.78-1.69] | 0.50    |
| kidney disease | D1 | 1.21           | [0.84-1.75] | 0.31    | 0.97                         | [0.55-1.70] | 0.917   | 1.95                     | [1.14-3.31] | 0.014   |
|                | D2 | 1.27           | [0.72-2.23] | 0.42    | 1.05                         | [0.48-2.33] | 0.898   | 1.64                     | [0.70-3.86] | 0.26    |
| lung disease   | D1 | 1.02           | [0.91-1.15] | 0.72    | 0.93                         | [0.81-1.07] | 0.294   | 1.27                     | [1.02-1.59] | 0.030   |
|                | D2 | 1.01           | [0.84-1.20] | 0.96    | 0.97                         | [0.77-1.21] | 0.765   | 1.06                     | [0.78-1.43] | 0.71    |
| heart disease  | D1 | 1.03           | [0.84-1.25] | 0.78    | 0.81                         | [0.52-1.26] | 0.354   | 1.30                     | [1.03-1.65] | 0.031   |
|                | D2 | 0.97           | [0.72-1.31] | 0.83    | 0.61                         | [0.33-1.14] | 0.124   | 1.31                     | [0.90-1.89] | 0.16    |
| diabetes       | D1 | 0.87           | [0.71-1.07] | 0.19    | 0.67                         | [0.48-0.94] | 0.019   | 1.02                     | [0.77-1.36] | 0.87    |
|                | D2 | 0.87           | [0.64-1.18] | 0.36    | 0.84                         | [0.52-1.37] | 0.487   | 0.94                     | [0.62-1.44] | 0.79    |
| asthma         | D1 | 1.02           | [0.92-1.14] | 0.640   | 0.97                         | [0.86-1.10] | 0.635   | 1.21                     | [0.99-1.47] | 0.063   |
|                | D2 | 1.07           | [0.92-1.26] | 0.38    | 1.04                         | [0.85-1.26] | 0.718   | 1.18                     | [0.90-1.56] | 0.23    |
| cancer         | D1 | 0.87           | [0.62-1.20] | 0.39    | 1.06                         | [0.51-2.17] | 0.880   | 0.95                     | [0.65-1.40] | 0.79    |
|                | D2 | 0.74           | [0.43-1.25] | 0.26    | 1.19                         | [0.44-3.23] | 0.726   | 0.67                     | [0.35-1.30] | 0.24    |

OR = Odds ratio; CI = Confidence interval; BMI = Body mass index; D1=After first dose; D2=After second dose

**Supplementary Table 5. Sensitivity analysis of frailty and each comorbidity using Inverse Probability Weighting (IPW) for probability of vaccination. Each univariate analysis is adjusted by age, BMI, and sex.**

|                |    | All age groups |             |         | Younger adults (18-59 years) |             |         | Older adults (60+ years) |             |         |
|----------------|----|----------------|-------------|---------|------------------------------|-------------|---------|--------------------------|-------------|---------|
|                |    | OR             | 95% CI      | p-value | OR                           | 95% CI      | p-value | OR                       | 95% CI      | p-value |
| frailty        | D1 | 0.96           | [0.81-1.12] | 0.57    | 0.69                         | [0.53-0.90] | 0.007   | 2.08                     | [1.65-2.62] | <0.0001 |
|                | D2 | 0.79           | [0.61-1.01] | 0.07    | 0.63                         | [0.42-0.96] | 0.032   | 1.19                     | [0.84-1.68] | 0.34    |
| kidney disease | D1 | 1.12           | [0.80-1.58] | 0.51    | 0.89                         | [0.53-1.48] | 0.649   | 1.8                      | [1.10-2.96] | 0.020   |
|                | D2 | 1.34           | [0.80-2.24] | 0.27    | 1.03                         | [0.50-2.12] | 0.943   | 1.9                      | [0.86-4.22] | 0.11    |
| lung disease   | D1 | 1.02           | [0.92-1.13] | 0.69    | 0.9                          | [0.80-1.02] | 0.104   | 1.38                     | [1.13-1.67] | 0.0010  |
|                | D2 | 1.01           | [0.87-1.18] | 0.86    | 0.95                         | [0.78-1.15] | 0.579   | 1.16                     | [0.89-1.52] | 0.27    |
| heart disease  | D1 | 1.01           | [0.83-1.21] | 0.96    | 0.78                         | [0.52-1.19] | 0.247   | 1.29                     | [1.03-1.61] | 0.028   |
|                | D2 | 0.9            | [0.68-1.20] | 0.48    | 0.56                         | [0.31-0.99] | 0.045   | 1.25                     | [0.88-1.76] | 0.22    |
| diabetes       | D1 | 0.78           | [0.64-0.94] | 0.010   | 0.62                         | [0.46-0.84] | 0.002   | 0.88                     | [0.67-1.14] | 0.33    |
|                | D2 | 0.74           | [0.56-0.99] | 0.041   | 0.72                         | [0.46-1.12] | 0.143   | 0.78                     | [0.53-1.16] | 0.22    |
| asthma         | D1 | 1.02           | [0.93-1.11] | 0.70    | 0.96                         | [0.87-1.07] | 0.448   | 1.23                     | [1.04-1.47] | 0.019   |
|                | D2 | 1.07           | [0.93-1.23] | 0.34    | 1.02                         | [0.86-1.21] | 0.81    | 1.25                     | [0.98-1.59] | 0.073   |
| cancer         | D1 | 0.78           | [0.57-1.08] | 0.14    | 1.21                         | [0.62-2.35] | 0.574   | 0.8                      | [0.54-1.17] | 0.24    |
|                | D2 | 0.72           | [0.44-1.19] | 0.20    | 1.34                         | [0.54-3.35] | 0.532   | 0.61                     | [0.32-1.14] | 0.12    |

OR = Odds ratio; CI = Confidence interval; BMI = Body mass index; D1=After first dose; D2=After second dose

**Supplementary Table 6. Univariate analysis of Index of Multiple Deprivation (IMD) category, obesity status and healthy lifestyle factors.**

|                         |    | All age groups |             |         | Younger adults (18-59 years) |             |         | Older adults (60+ years) |             |         |
|-------------------------|----|----------------|-------------|---------|------------------------------|-------------|---------|--------------------------|-------------|---------|
|                         |    | OR             | 95% CI      | p-value | OR                           | 95% CI      | p-value | OR                       | 95% CI      | p-value |
| IMD[1-3]                | D1 | 1.11           | [1.01-1.23] | 0.039   | 1.06                         | [0.94-1.19] | 0.383   | 1.26                     | [1.03-1.53] | 0.021   |
|                         | D2 | 1.00           | [0.85-1.18] | 0.98    | 0.86                         | [0.70-1.06] | 0.161   | 1.28                     | [0.96-1.69] | 0.091   |
| IMD[8-10]               | D1 | 0.91           | [0.84-0.98] | 0.017   | 0.93                         | [0.85-1.03] | 0.174   | 0.84                     | [0.73-0.96] | 0.014   |
|                         | D2 | 0.94           | [0.83-1.07] | 0.37    | 0.95                         | [0.80-1.13] | 0.554   | 0.93                     | [0.76-1.13] | 0.46    |
| Healthy lifestyle score | D1 | 0.96           | [0.91-1.01] | 0.12    | 0.97                         | [0.91-1.04] | 0.443   | 0.91                     | [0.82-1.02] | 0.095   |
|                         | D2 | 0.98           | [0.90-1.07] | 0.67    | 0.93                         | [0.83-1.03] | 0.174   | 1.03                     | [0.89-1.20] | 0.68    |
| Healthier diet          | D1 | 0.93           | [0.84-1.03] | 0.14    | 0.92                         | [0.82-1.04] | 0.176   | 0.88                     | [0.73-1.06] | 0.18    |
|                         | D2 | 0.91           | [0.79-1.06] | 0.23    | 0.83                         | [0.68-1.01] | 0.066   | 0.98                     | [0.77-1.26] | 0.89    |
| Non obese               | D1 | 0.84           | [0.75-0.94] | 0.0030  | 0.88                         | [0.77-1.00] | 0.052   | 0.85                     | [0.67-1.06] | 0.15    |
|                         | D2 | 0.88           | [0.74-1.05] | 0.17    | 0.84                         | [0.67-1.04] | 0.105   | 0.95                     | [0.70-1.30] | 0.77    |
| Non smoker              | D1 | 1.16           | [0.87-1.54] | 0.32    | 1.14                         | [0.83-1.57] | 0.422   | 1.15                     | [0.54-2.44] | 0.71    |
|                         | D2 | 1.60           | [0.95-2.70] | 0.075   | 1.82                         | [0.99-3.37] | 0.055   | 1.08                     | [0.36-3.25] | 0.89    |
| Non sedentary           | D1 | 1.07           | [0.95-1.21] | 0.25    | 1.13                         | [0.98-1.30] | 0.102   | 0.94                     | [0.75-1.18] | 0.58    |
|                         | D2 | 1.14           | [0.94-1.38] | 0.17    | 1.03                         | [0.81-1.30] | 0.822   | 1.24                     | [0.90-1.72] | 0.20    |

OR = Odds ratio; CI = Confidence interval; IMD[1-3] = high deprivation, IMD[8-10] = low deprivation; reference category for IMD is the intermediate category IMD [4-7]; D1=After first dose; D2=After second dose  
All the univariate models are adjusted by age, BMI, and sex, except Not obese that is adjusted by only age and sex

**Supplementary Table 7. Sensitivity analysis of univariate analyses for IMD categories, obesity status, and healthy lifestyle factors, using Inverse Probability Weighting (IPW) for probability of vaccination.**

|                         |    | All age groups |             |         | Younger adults (18-59 years) |             |         | Older adults (60+ years) |             |         |
|-------------------------|----|----------------|-------------|---------|------------------------------|-------------|---------|--------------------------|-------------|---------|
|                         |    | OR             | 95% CI      | p-value | OR                           | 95% CI      | p-value | OR                       | 95% CI      | p-value |
| IMD[1-3]                | D1 | 1·19           | [1·08-1·30] | <0·0001 | 1·12                         | [1·00-1·25] | 0·04    | 1·39                     | [1·15-1·68] | 0·0010  |
|                         | D2 | 1·00           | [0·85-1·18] | 0·98    | 0·86                         | [0·70-1·06] | 0·16    | 1·28                     | [0·96-1·69] | 0·091   |
| IMD[8-10]               | D1 | 0·91           | [0·85-0·97] | 0·0050  | 0·93                         | [0·86-1·01] | 0·10    | 0·84                     | [0·75-0·95] | 0·0050  |
|                         | D2 | 0·94           | [0·83-1·07] | 0·37    | 0·95                         | [0·80-1·13] | 0·55    | 0·93                     | [0·76-1·13] | 0·46    |
| Healthy lifestyle score | D1 | 0·97           | [0·92-1·02] | 0·26    | 0·99                         | [0·93-1·06] | 0·85    | 0·92                     | [0·83-1·02] | 0·12    |
|                         | D2 | 1·02           | [0·93-1·11] | 0·71    | 0·97                         | [0·87-1·08] | 0·58    | 1·07                     | [0·92-1·25] | 0·35    |
| Healthier diet          | D1 | 0·95           | [0·86-1·04] | 0·25    | 0·93                         | [0·83-1·04] | 0·20    | 0·92                     | [0·77-1·10] | 0·35    |
|                         | D2 | 0·95           | [0·81-1·10] | 0·46    | 0·84                         | [0·69-1·02] | 0·074   | 1·09                     | [0·85-1·40] | 0·50    |
| Non obese               | D1 | 0·86           | [0·77-0·96] | 0·0060  | 0·94                         | [0·82-1·06] | 0·31    | 0·80                     | [0·64-1·00] | 0·046   |
|                         | D2 | 0·94           | [0·79-1·11] | 0·48    | 0·94                         | [0·76-1·16] | 0·57    | 0·95                     | [0·70-1·29] | 0·76    |
| Non smoker              | D1 | 1·13           | [0·88-1·44] | 0·34    | 1·09                         | [0·83-1·42] | 0·53    | 1·24                     | [0·62-2·49] | 0·54    |
|                         | D2 | 1·55           | [0·99-2·43] | 0·055   | 1·91                         | [1·14-3·22] | 0·014   | 0·71                     | [0·23-2·22] | 0·56    |
| Non sedentary           | D1 | 1·08           | [0·97-1·21] | 0·18    | 1·14                         | [0·99-1·30] | 0·064   | 0·95                     | [0·76-1·19] | 0·68    |
|                         | D2 | 1·16           | [0·97-1·40] | 0·099   | 1·04                         | [0·83-1·30] | 0·73    | 1·32                     | [0·95-1·82] | 0·10    |

OR = Odds ratio; CI = Confidence interval; IMD[1-3] = high deprivation, IMD[8-10] = low deprivation; reference category for IMD is the intermediate category IMD [4-7]; D1=After first dose; D2=After second dose.  
 All the univariate models are adjusted by age, BMI, and sex, except Not obese that is adjusted by only age and sex.

**Supplementary Table 8. Multivariate analysis of frailty, IMD category, obesity status and healthy lifestyle factors, adjusted for age, BMI, and sex.**

|                |    | All age groups |              |         | Younger adults (18-59 years) |             |         | Older adults (60+ years) |             |         |
|----------------|----|----------------|--------------|---------|------------------------------|-------------|---------|--------------------------|-------------|---------|
|                |    | OR             | 95% CI       | p-value | OR                           | 95% CI      | p-value | OR                       | 95% CI      | p-value |
| Frailty        | D1 | 0.77           | [0.57-1.06]  | 0.11    | 0.75                         | [0.48-1.16] | 0.20    | 1.06                     | [0.65-1.73] | 0.82    |
|                | D2 | 0.84           | [0.52-1.34]  | 0.46    | 0.90                         | [0.44-1.83] | 0.78    | 0.97                     | [0.50-1.87] | 0.92    |
| IMD[1-3]       | D1 | 1.04           | [0.91-1.20]  | 0.50    | 1.02                         | [0.87-1.19] | 0.80    | 1.08                     | [0.81-1.44] | 0.61    |
|                | D2 | 0.94           | [0.75-1.16]  | 0.56    | 0.79                         | [0.61-1.04] | 0.091   | 1.29                     | [0.87-1.93] | 0.21    |
| IMD[8-10]      | D1 | 0.89           | [0.81-1.00]  | 0.041   | 0.91                         | [0.80-1.03] | 0.15    | 0.84                     | [0.69-1.02] | 0.084   |
|                | D2 | 0.97           | [0.783-1.14] | 0.71    | 0.93                         | [0.76-1.14] | 0.49    | 1.01                     | [0.78-1.32] | 0.93    |
| Healthier diet | D1 | 0.93           | [0.84-1.03]  | 0.15    | 0.91                         | [0.81-1.03] | 0.14    | 0.90                     | [0.75-1.08] | 0.26    |
|                | D2 | 0.90           | [0.78-1.05]  | 0.20    | 0.83                         | [0.68-1.01] | 0.063   | 0.98                     | [0.77-1.26] | 0.90    |
| Non obese      | D1 | 0.84           | [0.75-0.95]  | 0.0040  | 1.16                         | [1.00-1.34] | 0.049   | 0.87                     | [0.69-1.10] | 0.24    |
|                | D2 | 0.87           | [0.73-1.04]  | 0.13    | 1.06                         | [0.83-1.35] | 0.085   | 0.93                     | [0.68-1.28] | 0.66    |
| Non smoker     | D1 | 1.18           | [0.88-1.57]  | 0.27    | 1.15                         | [0.84-1.58] | 0.39    | 1.21                     | [0.57-2.58] | 0.62    |
|                | D2 | 1.60           | [0.95-2.69]  | 0.081   | 1.86                         | [1.00-3.46] | 0.049   | 1.02                     | [0.34-3.05] | 0.97    |
| Non sedentary  | D1 | 1.10           | [0.98-1.25]  | 0.099   | 1.16                         | [1.00-1.34] | 0.046   | 0.99                     | [0.79-1.26] | 0.96    |
|                | D2 | 1.16           | [0.96-1.40]  | 0.13    | 1.06                         | [0.83-1.34] | 0.64    | 1.27                     | [0.91-1.78] | 0.16    |

OR = Odds ratio; CI = Confidence interval; IMD[1-3] = high deprivation, IMD[8-10] = low deprivation; reference category for IMD is the intermediate category IMD [4-7]; D1=After first dose; D2=After second dose  
 All the univariate models are adjusted by age, BMI, and sex, except Not obese that is adjusted by only age and sex

**Supplementary Table 9. Sensitivity analysis of the multivariate model for frailty, IMD categories, obesity status, and healthy lifestyle factors, using Inverse Probability Weighting (IPW) for probability of vaccination. The analysis is adjusted by age and sex.**

|                |    | All age groups |             |         | Younger adults (18-59 years) |             |         | Older adults (60+ years) |             |         |
|----------------|----|----------------|-------------|---------|------------------------------|-------------|---------|--------------------------|-------------|---------|
|                |    | OR             | 95% CI      | p-value | OR                           | 95% CI      | p-value | OR                       | 95% CI      | p-value |
| Frailty        | D1 | 0.77           | [0.57-1.06] | 0.11    | 1.15                         | [0.84-1.58] | 0.39    | 1.21                     | [0.57-2.58] | 0.62    |
|                | D2 | 0.84           | [0.52-1.34] | 0.46    | 1.86                         | [1.00-3.46] | 0.049   | 1.02                     | [0.34-3.05] | 0.97    |
| IMD[1-3]       | D1 | 1.05           | [0.91-1.20] | 0.50    | 1.16                         | [1.00-1.34] | 0.046   | 0.99                     | [0.79-1.26] | 0.96    |
|                | D2 | 0.94           | [0.75-1.16] | 0.56    | 1.06                         | [0.83-1.35] | 0.64    | 1.27                     | [0.91-1.78] | 0.16    |
| IMD[8-10]      | D1 | 0.90           | [0.81-1.00] | 0.04    | 0.91                         | [0.81-1.03] | 0.14    | 0.90                     | [0.75-1.08] | 0.26    |
|                | D2 | 0.97           | [0.83-1.14] | 0.71    | 0.83                         | [0.68-1.01] | 0.063   | 0.98                     | [0.77-1.26] | 0.90    |
| Healthier diet | D1 | 0.93           | [0.84-1.03] | 0.15    | 0.91                         | [0.80-1.03] | 0.15    | 0.84                     | [0.69-1.02] | 0.084   |
|                | D2 | 0.90           | [0.78-1.05] | 0.19    | 0.93                         | [0.76-1.14] | 0.49    | 1.01                     | [0.78-1.32] | 0.93    |
| Non obese      | D1 | 0.84           | [0.75-0.95] | <0.0001 | 1.02                         | [0.87-1.19] | 0.80    | 1.08                     | [0.81-1.44] | 0.61    |
|                | D2 | 0.87           | [0.73-1.04] | 0.13    | 0.79                         | [0.61-1.04] | 0.091   | 1.29                     | [0.87-1.93] | 0.21    |
| Non smoker     | D1 | 1.18           | [0.88-1.57] | 0.27    | 0.87                         | [0.76-1.00] | 0.049   | 0.87                     | [0.69-1.10] | 0.24    |
|                | D2 | 1.60           | [0.95-2.69] | 0.08    | 0.82                         | [0.66-1.03] | 0.091   | 0.93                     | [0.68-1.28] | 0.66    |
| Non sedentary  | D1 | 1.11           | [0.98-1.25] | 0.10    | 0.75                         | [0.48-1.16] | 0.20    | 1.06                     | [0.65-1.73] | 0.82    |
|                | D2 | 1.16           | [0.96-1.40] | 0.13    | 0.90                         | [0.44-1.83] | 0.78    | 0.97                     | [0.50-1.87] | 0.92    |

OR = Odds ratio; CI = Confidence interval; IMD[1-3] = high deprivation, IMD[8-10] = low deprivation; reference category for IMD is the intermediate category IMD [4-7]; D1=After first dose; D2=After second dose  
All the univariate models are adjusted by age, BMI, and sex, except Not obese that is adjusted by only age and sex

**Supplementary Table 10. Number and proportion of type of tests performed by individuals testing positive for in both cases (first and second dose vaccinated individuals) and controls (non-vaccinated individuals).**

|    | Cases-3 and Cases-4<br>n=3825 (D1)<br>n=906 (D2) |                              |                  | Controls-3 and Controls-4<br>n=3825 (D1)<br>n=906 (D2) |                              |                  |
|----|--------------------------------------------------|------------------------------|------------------|--------------------------------------------------------|------------------------------|------------------|
|    | RT-PCR confirmed tests<br>n(%)                   | LFAT confirmed tests<br>n(%) | Not sure<br>n(%) | RT-PCR confirmed tests<br>n(%)                         | LFAT confirmed tests<br>n(%) | Not sure<br>n(%) |
| D1 | 2666(70%)                                        | 927(24%)                     | 231(6%)          | 1883(49%)                                              | 362(9%)                      | 1580(41%)        |
| D2 | 592(65%)                                         | 270(30%)                     | 44(5%)           | 605(67%)                                               | 136(15%)                     | 165(18%)         |

n = number of individuals; D1=After first dose; D2=After second dose Cases-3=cases infected after the first dose but before the second dose of the vaccine; Cases-4=cases infected after the second dose of the vaccine; Controls-3 and Controls-4=unvaccinated users tested positive after first and second dose matched with Cases-3 and Cases-4, respectively

**Supplementary Table 11. Univariate analysis assessing the probability of asymptomatic infection, severe disease (>5 reported symptoms during acute infection), hospitalisation and duration of symptoms  $\geq 28$  days in app participants following first and second vaccination, adjusted by age, BMI, and sex.**

|                                 |    | All age groups |             |         | Younger adults (18-59 years) |             |         | Older adults (60+ years) |             |         |
|---------------------------------|----|----------------|-------------|---------|------------------------------|-------------|---------|--------------------------|-------------|---------|
|                                 |    | OR             | 95% CI      | p-value | OR                           | 95% CI      | p-value | OR                       | 95% CI      | p-value |
| Hospitalisation                 | D1 | 0.31           | [0.25-0.38] | <0.0001 | 0.43                         | [0.32-0.58] | <0.0001 | 0.24                     | [0.18-0.31] | <0.0001 |
|                                 | D2 | 0.27           | [0.16-0.45] | <0.0001 | 0.57                         | [0.26-1.23] | 0.15    | 0.15                     | [0.07-0.32] | <0.0001 |
| >5 reported symptoms            | D1 | 0.74           | [0.65-0.84] | <0.0001 | 0.77                         | [0.65-0.91] | 0.0030  | 0.68                     | [0.55-0.84] | <0.0001 |
|                                 | D2 | 0.69           | [0.51-0.94] | 0.0180  | 0.70                         | [0.46-1.06] | 0.093   | 0.66                     | [0.42-1.03] | 0.067   |
| symptoms lasting $\geq 28$ days | D1 | 1.03           | [0.85-1.24] | 0.78    | 1.22                         | [0.94-1.60] | 0.14    | 0.87                     | [0.67-1.13] | 0.29    |
|                                 | D2 | 0.51           | [0.32-0.82] | 0.0060  | 0.37                         | [0.16-0.88] | 0.025   | 0.56                     | [0.31-0.98] | 0.044   |
| Asymptomatic infection          | D1 | 1.63           | [1.43-1.86] | <0.0001 | 1.36                         | [1.14-1.62] | <0.0001 | 2.06                     | [1.68-2.52] | <0.0001 |
|                                 | D2 | 1.94           | [1.49-2.54] | <0.0001 | 1.49                         | [1.00-2.24] | 0.050   | 2.38                     | [1.66-3.41] | <0.0001 |

OR = Odds ratio; CI = Confidence interval; BMI = Body mass index; D1=After first dose; D2=After second dose

**Supplementary Table 12. Numbers and proportions of individual symptoms in app participants testing positive following first and second vaccination, and in unvaccinated controls.**

|                       |    | Cases-3 and Cases-4             |                                            |                                         | Controls-3 and Controls-4       |                                           |                                          |
|-----------------------|----|---------------------------------|--------------------------------------------|-----------------------------------------|---------------------------------|-------------------------------------------|------------------------------------------|
|                       |    | All<br>n=3825 (D1)<br>n=906(D2) | [18-59 years]<br>n=2320 (D1)<br>n=455 (D2) | [60+ years]<br>n=1505 (D1)<br>n=451(D2) | All<br>n=3285 (D1)<br>n=906(D2) | [18-59 years]<br>n=2363 (D1)<br>n=474(D2) | [60+ years]<br>n= 1462 (D1)<br>n=432(D2) |
| Fever n(%)            | D1 | 2525(68.6)                      | 1628(72.9)                                 | 897(61.9)                               | 2825(82.0)                      | 1760(83.0)                                | 1065(80.4)                               |
|                       | D2 | 549(61.9)                       | 308(69.4)                                  | 241(54.4)                               | 689(82.5)                       | 360(84.7)                                 | 329(80.2)                                |
| Persistent cough n(%) | D1 | 1200(32.6)                      | 780(34.9)                                  | 420(29.0)                               | 1328(38.5)                      | 806(38.0)                                 | 522(39.4)                                |
|                       | D2 | 248(28.0)                       | 138(31.1)                                  | 110(24.8)                               | 335(40.1)                       | 172(40.5)                                 | 163(39.8)                                |
| Loss of smell n(%)    | D1 | 841(22.8)                       | 581(26.0)                                  | 260(17.9)                               | 1591(46.2)                      | 962(45.4)                                 | 629(47.5)                                |
|                       | D2 | 184(20.7)                       | 115(25.9)                                  | 69(15.6)                                | 413(49.5)                       | 203(47.8)                                 | 210(51.2)                                |
| Fatigue n(%)          | D1 | 1798(48.8)                      | 1178(52.7)                                 | 620(42.8)                               | 2246(65.2)                      | 1378(65.0)                                | 868(65.6)                                |
|                       | D2 | 388(43.7)                       | 219(49.3)                                  | 169(38.1)                               | 548(65.6)                       | 270(63.5)                                 | 278(67.8)                                |
| Headache n(%)         | D1 | 1795(48.7)                      | 1228(55.0)                                 | 567(39.1)                               | 2158(62.6)                      | 1414(66.7)                                | 744(56.2)                                |
|                       | D2 | 369(41.6)                       | 237(53.4)                                  | 132(29.8)                               | 507(60.7)                       | 270(63.5)                                 | 237(57.8)                                |
| Runny nose n(%)       | D1 | 1779(48.3)                      | 1198(53.6)                                 | 581(40.1)                               | 2059(59.8)                      | 1307(61.6)                                | 752(56.8)                                |
|                       | D2 | 381(43.0)                       | 225(50.7)                                  | 156(35.2)                               | 513(61.4)                       | 261(61.4)                                 | 252(61.5)                                |
| Sneezing n(%)         | D1 | 1560(42.4)                      | 1053(47.1)                                 | 507(35.0)                               | 1368(39.7)                      | 873(41.2)                                 | 495(37.4)                                |
|                       | D2 | 346(39.0)                       | 204(45.9)                                  | 142(32.1)                               | 354(42.4)                       | 179(42.1)                                 | 175(42.7)                                |
| Sore throat n(%)      | D1 | 1229(33.4)                      | 859(38.5)                                  | 370(25.5)                               | 1583(46.0)                      | 1055(49.7)                                | 528(39.9)                                |
|                       | D2 | 260(29.3)                       | 161(36.3)                                  | 99(22.3)                                | 400(47.9)                       | 211(49.6)                                 | 189(46.1)                                |
|                       | D1 | 883(24.0)                       | 593(26.5)                                  | 290(20.0)                               | 1071(31.1)                      | 681(32.1)                                 | 390(29.5)                                |



|                                     |    |           |           |           |            |           |           |
|-------------------------------------|----|-----------|-----------|-----------|------------|-----------|-----------|
| Dizziness or lightheadedness n(%)   | D2 | 177(20.0) | 115(25.9) | 62(14.0)  | 240(28.7)  | 129(30.4) | 111(27.1) |
| Chills or shivers n(%)              | D1 | 815(22.1) | 519(23.2) | 296(20.4) | 1164(33.8) | 717(33.8) | 447(33.8) |
|                                     | D2 | 152(17.1) | 76(17.1)  | 76(17.2)  | 251(30.1)  | 126(29.6) | 125(30.5) |
| Hoarse voice n(%)                   | D1 | 913(24.8) | 597(26.7) | 316(21.8) | 1073(31.1) | 679(32.0) | 394(29.8) |
|                                     | D2 | 182(20.5) | 101(22.7) | 81(18.3)  | 283(33.9)  | 143(33.6) | 140(34.1) |
| Skipped meals n(%)                  | D1 | 623(16.9) | 402(18.0) | 221(15.3) | 914(26.5)  | 518(24.4) | 396(29.9) |
|                                     | D2 | 138(15.6) | 80(18.0)  | 58(13.1)  | 210(25.1)  | 107(25.2) | 103(25.1) |
| Brain fog n(%)                      | D1 | 755(20.5) | 536(24.0) | 219(15.1) | 769(22.3)  | 500(23.6) | 269(20.3) |
|                                     | D2 | 150(16.9) | 89(20.0)  | 61(13.8)  | 173(20.7)  | 90(21.2)  | 83(20.2)  |
| Unusual muscle pains n(%)           | D1 | 639(17.3) | 442(19.8) | 197(13.6) | 762(22.1)  | 526(24.8) | 236(17.8) |
|                                     | D2 | 126(14.2) | 82(18.5)  | 44(9.9)   | 156(18.7)  | 99(23.3)  | 57(13.9)  |
| Eye soreness n(%)                   | D1 | 677(18.4) | 463(20.7) | 214(14.8) | 857(24.9)  | 567(26.7) | 290(21.9) |
|                                     | D2 | 154(17.4) | 93(20.9)  | 61(13.8)  | 216(25.9)  | 125(29.4) | 91(22.2)  |
| Diarrhoea n(%)                      | D1 | 485(13.2) | 317(14.2) | 168(11.6) | 766(22.2)  | 453(21.4) | 313(23.6) |
|                                     | D2 | 92(10.4)  | 58(13.1)  | 34(7.7)   | 175(21.1)  | 88(20.7)  | 87(21.2)  |
| Shortness of breath n(%)            | D1 | 605(16.4) | 410(18.4) | 195(13.5) | 566(16.4)  | 340(16.0) | 226(17.1) |
|                                     | D2 | 102(11.5) | 65(14.6)  | 37(8.4)   | 118(14.1)  | 62(14.6)  | 56(13.7)  |
| Low mood n(%)                       | D1 | 508(13.8) | 346(15.5) | 162(11.2) | 677(19.7)  | 387(18.2) | 290(21.9) |
|                                     | D2 | 98(11.0)  | 66(14.9)  | 32(7.2)   | 173(20.7)  | 83(19.5)  | 90(22.0)  |
| Chest pain n(%)                     | D1 | 601(16.3) | 427(19.1) | 174(12.0) | 610(17.7)  | 400(18.9) | 210(15.9) |
|                                     | D2 | 105(11.8) | 67(15.1)  | 38(8.6)   | 124(14.9)  | 64(15.1)  | 60(14.6)  |
| Nausea n(%)                         | D1 | 433(11.8) | 293(13.1) | 140(9.7)  | 641(18.6)  | 391(18.4) | 250(18.9) |
|                                     | D2 | 97(10.9)  | 67(15.1)  | 30(6.8)   | 124(14.9)  | 65(15.3)  | 59(14.4)  |
| Tinnitus n(%)                       | D1 | 452(12.3) | 291(13.0) | 161(11.1) | 501(14.5)  | 306(14.4) | 195(14.7) |
|                                     | D2 | 89(10.0)  | 52(11.7)  | 37(8.4)   | 129(15.4)  | 58(13.6)  | 71(17.3)  |
| Abdominal pain n(%)                 | D1 | 396(10.8) | 260(11.6) | 136(9.4)  | 493(14.3)  | 310(14.6) | 183(13.8) |
|                                     | D2 | 80(9.0)   | 54(12.2)  | 26(5.9)   | 116(13.9)  | 62(14.6)  | 54(13.2)  |
| Earache n(%)                        | D1 | 423(11.5) | 321(14.4) | 102(7.0)  | 416(12.1)  | 285(13.4) | 131(9.9)  |
|                                     | D2 | 87(9.8)   | 61(13.7)  | 26(5.9)   | 98(11.7)   | 58(13.6)  | 40(9.8)   |
| Swollen glands n(%)                 | D1 | 449(12.2) | 329(14.7) | 120(8.3)  | 413(12.0)  | 287(13.5) | 126(9.5)  |
|                                     | D2 | 110(12.4) | 79(17.8)  | 31(7.0)   | 97(11.6)   | 58(13.6)  | 39(9.5)   |
| Sensation of skin n(%)burning       | D1 | 260(7.1)  | 184(8.2)  | 76(5.2)   | 472(13.7)  | 315(14.9) | 157(11.9) |
|                                     | D2 | 52(5.9)   | 32(7.2)   | 20(4.5)   | 99(11.9)   | 57(13.4)  | 42(10.2)  |
| Delirium or reported confusion n(%) | D1 | 338(9.2)  | 213(9.5)  | 125(8.6)  | 396(11.5)  | 237(11.2) | 159(12.0) |
|                                     | D2 | 59(6.7)   | 37(8.3)   | 22(5.0)   | 84(10.1)   | 41(9.6)   | 43(10.5)  |
| Irregular heartbeat n(%)            | D1 | 264(7.2)  | 187(8.4)  | 77(5.3)   | 344(10.0)  | 219(10.3) | 125(9.4)  |
|                                     | D2 | 55(6.2)   | 33(7.4)   | 22(5.0)   | 79(9.5)    | 38(8.9)   | 41(10.0)  |
| typical hayfever n(%)               | D1 | 273(7.4)  | 213(9.5)  | 60(4.1)   | 364(10.6)  | 229(10.8) | 135(10.2) |
|                                     | D2 | 96(10.8)  | 74(16.7)  | 22(5.0)   | 116(13.9)  | 60(14.1)  | 56(13.7)  |
| rash n(%)                           | D1 | 112(3.0)  | 62(2.8)   | 50(3.5)   | 167(4.8)   | 98(4.6)   | 69(5.2)   |
|                                     | D2 | 25(2.8)   | 14(3.2)   | 11(2.5)   | 37(4.4)    | 17(4.0)   | 20(4.9)   |
|                                     | D1 | 112(3.0)  | 62(2.8)   | 50(3.5)   | 167(4.8)   | 98(4.6)   | 69(5.2)   |

|                                |    |         |         |         |          |         |         |
|--------------------------------|----|---------|---------|---------|----------|---------|---------|
| red welts on face or lips n(%) | D2 | 14(1.6) | 10(2.3) | 4(0.9)  | 32(3.8)  | 15(3.5) | 17(4.1) |
| blisters on feet n(%)          | D1 | 76(2.1) | 52(2.3) | 24(1.7) | 142(4.1) | 80(3.8) | 62(4.7) |
|                                | D2 | 7(0.8)  | 3(0.7)  | 4(0.9)  | 6(0.7)   | 2(0.5)  | 4(1.0)  |
| hair loss n(%)                 | D1 | 30(0.8) | 12(0.5) | 18(1.2) | 28(0.8)  | 12(0.6) | 16(1.2) |
|                                | D2 | 5(0.6)  | 3(0.7)  | 2(0.5)  | 10(1.2)  | 5(1.2)  | 5(1.2)  |

n=number of individuals; D1=After first dose; D2=After second dose; Cases-3=cases infected after the first dose but before the second dose of the vaccine; Cases-4=cases infected after the second dose of the vaccine; Controls-3 and Controls-4=unvaccinated users tested positive after first and second dose matched with Cases-3 and Cases-4, respectively  
Symptoms are ordered by frequency, core symptoms highlighted in gray ((<https://www.nhs.uk/conditions/coronavirus-covid-19/symptoms/main-symptoms/>))

**Supplementary Table 13. Univariate analysis assessing the probability of experiencing each symptom in app participants following first and second vaccination, adjusted by age, BMI, sex.**

|                            |    | All age groups |             |         | Younger adults (18-59 years) |             |         | Older adults (60+ years) |             |         |
|----------------------------|----|----------------|-------------|---------|------------------------------|-------------|---------|--------------------------|-------------|---------|
|                            |    | OR             | 95% CI      | p-value | OR                           | 95% CI      | p-value | OR                       | 95% CI      | p-value |
| Fever                      | D1 | 0.35           | [0.31-0.38] | <0.0001 | 0.42                         | [0.37-0.48] | <0.0001 | 0.24                     | [0.20-0.28] | <0.0001 |
|                            | D2 | 0.27           | [0.22-0.33] | <0.0001 | 0.38                         | [0.29-0.51] | <0.0001 | 0.17                     | [0.13-0.24] | <0.0001 |
| Persistent cough           | D1 | 0.77           | [0.70-0.85] | <0.0001 | 0.87                         | [0.77-0.99] | 0.032   | 0.63                     | [0.53-0.73] | <0.0001 |
|                            | D2 | 0.57           | [0.47-0.70] | <0.0001 | 0.65                         | [0.49-0.86] | <0.0001 | 0.5                      | [0.38-0.68] | <0.0001 |
| Loss of smell              | D1 | 0.48           | [0.43-0.54] | <0.0001 | 0.55                         | [0.47-0.63] | <0.0001 | 0.4                      | [0.33-0.47] | <0.0001 |
|                            | D2 | 0.34           | [0.27-0.43] | <0.0001 | 0.4                          | [0.29-0.56] | <0.0001 | 0.3                      | [0.22-0.40] | <0.0001 |
| Fatigue                    | D1 | 0.51           | [0.46-0.56] | <0.0001 | 0.6                          | [0.53-0.68] | <0.0001 | 0.39                     | [0.34-0.46] | <0.0001 |
|                            | D2 | 0.41           | [0.33-0.49] | <0.0001 | 0.55                         | [0.42-0.72] | <0.0001 | 0.29                     | [0.22-0.39] | <0.0001 |
| Headache                   | D1 | 0.56           | [0.51-0.62] | <0.0001 | 0.6                          | [0.53-0.68] | <0.0001 | 0.49                     | [0.42-0.57] | <0.0001 |
|                            | D2 | 0.45           | [0.37-0.55] | <0.0001 | 0.63                         | [0.48-0.83] | <0.0001 | 0.3                      | [0.23-0.41] | <0.0001 |
| Runny nose                 | D1 | 0.63           | [0.57-0.69] | <0.0001 | 0.72                         | [0.63-0.81] | <0.0001 | 0.5                      | [0.43-0.59] | <0.0001 |
|                            | D2 | 0.47           | [0.39-0.57] | <0.0001 | 0.63                         | [0.48-0.83] | <0.0001 | 0.34                     | [0.26-0.45] | <0.0001 |
| Sneezing                   | D1 | 1.12           | [1.02-1.23] | 0.023   | 1.27                         | [1.13-1.43] | <0.0001 | 0.91                     | [0.78-1.06] | 0.23    |
|                            | D2 | 0.87           | [0.72-1.06] | 0.17    | 1.15                         | [0.88-1.51] | 0.31    | 0.65                     | [0.49-0.86] | <0.0001 |
| Sore throat                | D1 | 0.59           | [0.53-0.65] | <0.0001 | 0.63                         | [0.56-0.71] | <0.0001 | 0.51                     | [0.44-0.61] | <0.0001 |
|                            | D2 | 0.45           | [0.36-0.54] | <0.0001 | 0.56                         | [0.43-0.74] | <0.0001 | 0.34                     | [0.25-0.46] | <0.0001 |
| Dizziness /lightheadedness | D1 | 0.7            | [0.63-0.77] | <0.0001 | 0.76                         | [0.67-0.87] | <0.0001 | 0.6                      | [0.50-0.71] | <0.0001 |
|                            | D2 | 0.61           | [0.49-0.76] | <0.0001 | 0.78                         | [0.58-1.05] | 0.10    | 0.44                     | [0.31-0.63] | <0.0001 |
| Chills or shivers          | D1 | 0.56           | [0.50-0.62] | <0.0001 | 0.59                         | [0.51-0.67] | <0.0001 | 0.5                      | [0.42-0.60] | <0.0001 |
|                            | D2 | 0.48           | [0.38-0.60] | <0.0001 | 0.49                         | [0.35-0.68] | <0.0001 | 0.47                     | [0.34-0.66] | <0.0001 |
| Hoarse voice               | D1 | 0.73           | [0.66-0.81] | <0.0001 | 0.77                         | [0.67-0.88] | <0.0001 | 0.66                     | [0.56-0.78] | <0.0001 |
|                            | D2 | 0.5            | [0.40-0.62] | <0.0001 | 0.56                         | [0.41-0.76] | <0.0001 | 0.43                     | [0.32-0.60] | <0.0001 |
| Skipped meals              | D1 | 0.56           | [0.50-0.63] | <0.0001 | 0.67                         | [0.58-0.78] | <0.0001 | 0.41                     | [0.34-0.50] | <0.0001 |
|                            | D2 | 0.54           | [0.43-0.69] | <0.0001 | 0.62                         | [0.45-0.87] | 0.012   | 0.44                     | [0.31-0.63] | <0.0001 |
| Brain fog                  | D1 | 0.90           | [0.80-1.01] | 0.074   | 1.02                         | [0.89-1.18] | 0.76    | 0.7                      | [0.57-0.85] | <0.0001 |
|                            | D2 | 0.77           | [0.61-0.99] | 0.041   | 0.9                          | [0.65-1.26] | 0.54    | 0.63                     | [0.44-0.91] | 0.012   |

|                                |    |      |             |         |      |             |         |      |             |         |
|--------------------------------|----|------|-------------|---------|------|-------------|---------|------|-------------|---------|
| Unusual muscle pains           | D1 | 0.74 | [0.66-0.83] | <0.0001 | 0.74 | [0.64-0.86] | <0.0001 | 0.73 | [0.59-0.89] | <0.0001 |
|                                | D2 | 0.72 | [0.55-0.93] | 0.010   | 0.73 | [0.52-1.01] | 0.061   | 0.69 | [0.46-1.06] | 0.091   |
| Eye soreness                   | D1 | 0.68 | [0.61-0.76] | <0.0001 | 0.71 | [0.62-0.82] | <0.0001 | 0.62 | [0.51-0.75] | <0.0001 |
|                                | D2 | 0.6  | [0.47-0.75] | <0.0001 | 0.62 | [0.45-0.84] | <0.0001 | 0.57 | [0.40-0.81] | <0.0001 |
| Diarrhoea                      | D1 | 0.52 | [0.46-0.59] | <0.0001 | 0.6  | [0.51-0.71] | <0.0001 | 0.42 | [0.34-0.51] | <0.0001 |
|                                | D2 | 0.42 | [0.32-0.56] | <0.0001 | 0.55 | [0.38-0.79] | <0.0001 | 0.31 | [0.20-0.47] | <0.0001 |
| Shortness of breath            | D1 | 0.42 | [0.32-0.56] | <0.0001 | 0.55 | [0.38-0.79] | <0.0001 | 0.31 | [0.20-0.47] | <0.0001 |
|                                | D2 | 0.79 | [0.59-1.04] | 0.10    | 0.97 | [0.66-1.41] | 0.87    | 0.56 | [0.36-0.87] | 0.011   |
| Low mood                       | D1 | 0.65 | [0.57-0.74] | <0.0001 | 0.82 | [0.70-0.96] | 0.014   | 0.44 | [0.36-0.55] | <0.0001 |
|                                | D2 | 0.47 | [0.36-0.61] | <0.0001 | 0.69 | [0.49-0.99] | 0.042   | 0.28 | [0.18-0.43] | <0.0001 |
| Chest pain                     | D1 | 0.91 | [0.80-1.03] | 0.13    | 1.02 | [0.87-1.18] | 0.84    | 0.73 | [0.58-0.90] | <0.0001 |
|                                | D2 | 0.77 | [0.58-1.02] | 0.071   | 1    | [0.69-1.46] | 0.99    | 0.56 | [0.36-0.86] | 0.011   |
| Nausea                         | D1 | 0.58 | [0.50-0.66] | <0.0001 | 0.66 | [0.56-0.78] | <0.0001 | 0.45 | [0.36-0.57] | <0.0001 |
|                                | D2 | 0.69 | [0.52-0.92] | 0.011   | 0.95 | [0.66-1.38] | 0.79    | 0.43 | [0.27-0.69] | <0.0001 |
| Tinnitus                       | D1 | 0.82 | [0.71-0.94] | <0.0001 | 0.88 | [0.74-1.04] | 0.14    | 0.73 | [0.58-0.91] | 0.018   |
|                                | D2 | 0.6  | [0.45-0.81] | <0.0001 | 0.82 | [0.55-1.22] | 0.33    | 0.44 | [0.29-0.68] | <0.0001 |
| Abdominal pain                 | D1 | 0.72 | [0.62-0.83] | <0.0001 | 0.76 | [0.64-0.91] | <0.0001 | 0.65 | [0.51-0.82] | <0.0001 |
|                                | D2 | 0.6  | [0.44-0.82] | <0.0001 | 0.77 | [0.52-1.15] | 0.20    | 0.42 | [0.25-0.68] | <0.0001 |
| Earache                        | D1 | 0.94 | [0.82-1.09] | 0.44    | 1.07 | [0.90-1.27] | 0.44    | 0.69 | [0.52-0.90] | 0.014   |
|                                | D2 | 0.81 | [0.59-1.10] | 0.17    | 0.95 | [0.64-1.41] | 0.81    | 0.59 | [0.35-0.99] | 0.042   |
| Swollen glands                 | D1 | 1.02 | [0.89-1.18] | 0.74    | 1.1  | [0.93-1.31] | 0.27    | 0.86 | [0.66-1.12] | 0.26    |
|                                | D2 | 1.06 | [0.79-1.43] | 0.68    | 1.32 | [0.91-1.92] | 0.15    | 0.73 | [0.45-1.21] | 0.22    |
| Sensation of skin burning      | D1 | 0.48 | [0.41-0.56] | <0.0001 | 0.51 | [0.42-0.62] | <0.0001 | 0.41 | [0.31-0.55] | <0.0001 |
|                                | D2 | 0.47 | [0.33-0.66] | <0.0001 | 0.5  | [0.32-0.79] | <0.0001 | 0.42 | [0.24-0.73] | <0.0001 |
| Delirium or reported confusion | D1 | 0.77 | [0.66-0.90] | <0.0001 | 0.84 | [0.69-1.02] | 0.080   | 0.66 | [0.52-0.86] | <0.0001 |
|                                | D2 | 0.61 | [0.43-0.87] | 0.010   | 0.78 | [0.49-1.26] | 0.32    | 0.41 | [0.24-0.70] | <0.0001 |
| Irregular heartbeat            | D1 | 0.69 | [0.59-0.82] | <0.0001 | 0.79 | [0.64-0.97] | 0.020   | 0.54 | [0.40-0.72] | <0.0001 |
|                                | D2 | 0.62 | [0.43-0.89] | 0.010   | 0.79 | [0.49-1.29] | 0.35    | 0.48 | [0.28-0.82] | 0.017   |

OR = Odds ratio; CI = Confidence interval; D1=After first dose; D2=After second dose

**Supplementary Table 14. Univariate analysis assessing the probability of asymptomatic infection, severe disease (>5 reported symptoms during acute infection), hospitalisation, and duration of symptoms  $\geq$  28 days in app participants following first and second vaccination, adjusted by age, BMI, sex, frailty, and presence of at least one comorbidity.**

|                                 |    | All age groups |             |         | Younger adults (18-59 years) |             |         | Older adults (60+ years) |             |         |
|---------------------------------|----|----------------|-------------|---------|------------------------------|-------------|---------|--------------------------|-------------|---------|
|                                 |    | OR             | 95% CI      | p-value | OR                           | 95% CI      | p-value | OR                       | 95% CI      | p-value |
| Hospitalisation                 | D1 | 0.29           | [0.24-0.36] | <0.0001 | 0.42                         | [0.31-0.57] | <0.0001 | 0.22                     | [0.17-0.29] | <0.0001 |
|                                 | D2 | 0.26           | [0.15-0.43] | <0.0001 | 0.52                         | [0.24-1.13] | 0.10    | 0.15                     | [0.07-0.31] | <0.0001 |
| >5 reported symptoms            | D1 | 0.72           | [0.64-0.83] | <0.0001 | 0.76                         | [0.64-0.90] | 0.0010  | 0.66                     | [0.53-0.82] | <0.0001 |
|                                 | D2 | 0.65           | [0.48-0.89] | 0.0070  | 0.59                         | [0.38-0.90] | 0.016   | 0.64                     | [0.41-1.00] | 0.048   |
| symptoms lasting $\geq$ 28 days | D1 | 1.04           | [0.86-1.25] | 0.691   | 1.2                          | [0.92-1.57] | 0.18    | 0.88                     | [0.68-1.15] | 0.353   |
|                                 | D2 | 0.51           | [0.32-0.82] | 0.005   | 0.21                         | [0.08-0.59] | 0.003   | 0.58                     | [0.33-1.04] | 0.067   |
| Asymptomatic infection          | D1 | 1.62           | [1.42-1.86] | <0.0001 | 1.35                         | [1.13-1.61] | <0.0001 | 2.06                     | [1.69-2.53] | <0.0001 |
|                                 | D2 | 1.94           | [1.48-2.54] | <0.0001 | 1.49                         | [0.99-2.25] | 0.06    | 2.37                     | [1.65-3.41] | <0.0001 |

OR = Odds ratio; CI = Confidence interval; BMI = Body mass index; D1=After first dose; D2=After second dose

**Supplementary Table 15. Univariate analysis assessing the probability of experiencing each symptom in app participants following first and second vaccine dose, adjusted by age, BMI, sex, frailty, and presence of at least one comorbidity.**

|                            |    | All age groups |             |         | Younger adults (18-59 years) |             |         | Older adults (60+ years) |             |         |
|----------------------------|----|----------------|-------------|---------|------------------------------|-------------|---------|--------------------------|-------------|---------|
|                            |    | OR             | 95% CI      | p-value | OR                           | 95% CI      | p-value | OR                       | 95% CI      | p-value |
| Fever                      | D1 | 0.35           | [0.31-0.38] | <0.0001 | 0.42                         | [0.37-0.48] | <0.0001 | 0.24                     | [0.20-0.28] | <0.0001 |
|                            | D2 | 0.27           | [0.21-0.33] | <0.0001 | 0.36                         | [0.27-0.49] | <0.0001 | 0.17                     | [0.12-0.24] | <0.0001 |
| Persistent cough           | D1 | 0.77           | [0.69-0.85] | <0.0001 | 0.87                         | [0.77-0.98] | 0.030   | 0.63                     | [0.53-0.73] | <0.0001 |
|                            | D2 | 0.57           | [0.46-0.70] | <0.0001 | 0.62                         | [0.47-0.83] | 0.0010  | 0.51                     | [0.38-0.69] | <0.0001 |
| Loss of smell              | D1 | 0.48           | [0.43-0.54] | <0.0001 | 0.55                         | [0.47-0.64] | <0.0001 | 0.39                     | [0.33-0.47] | <0.0001 |
|                            | D2 | 0.34           | [0.27-0.42] | <0.0001 | 0.39                         | [0.28-0.55] | <0.0001 | 0.29                     | [0.21-0.40] | <0.0001 |
| Fatigue                    | D1 | 0.51           | [0.46-0.56] | <0.0001 | 0.59                         | [0.53-0.67] | <0.0001 | 0.39                     | [0.34-0.46] | <0.0001 |
|                            | D2 | 0.45           | [0.37-0.55] | <0.0001 | 0.62                         | [0.47-0.82] | 0.0010  | 0.3                      | [0.23-0.41] | <0.0001 |
| Headache                   | D1 | 0.57           | [0.51-0.62] | <0.0001 | 0.6                          | [0.53-0.68] | <0.0001 | 0.49                     | [0.42-0.57] | <0.0001 |
|                            | D2 | 0.45           | [0.37-0.55] | <0.0001 | 0.62                         | [0.47-0.82] | 0.0010  | 0.3                      | [0.23-0.41] | <0.0001 |
| Runny nose                 | D1 | 0.63           | [0.58-0.70] | <0.0001 | 0.72                         | [0.64-0.81] | <0.0001 | 0.5                      | [0.43-0.59] | <0.0001 |
|                            | D2 | 0.47           | [0.39-0.57] | <0.0001 | 0.62                         | [0.47-0.82] | 0.0010  | 0.34                     | [0.25-0.45] | <0.0001 |
| Sneezing                   | D1 | 1.14           | [1.03-1.25] | 0.010   | 1.28                         | [1.13-1.44] | <0.0001 | 0.92                     | [0.78-1.07] | 0.28    |
|                            | D2 | 0.88           | [0.72-1.07] | 0.19    | 1.16                         | [0.89-1.53] | 0.28    | 0.64                     | [0.48-0.85] | 0.0020  |
| Sore throat                | D1 | 0.59           | [0.54-0.65] | <0.0001 | 0.63                         | [0.56-0.71] | <0.0001 | 0.51                     | [0.44-0.60] | <0.0001 |
|                            | D2 | 0.44           | [0.36-0.54] | <0.0001 | 0.55                         | [0.42-0.72] | <0.0001 | 0.34                     | [0.25-0.46] | <0.0001 |
| Dizziness /lightheadedness | D1 | 0.7            | [0.63-0.77] | <0.0001 | 0.75                         | [0.66-0.86] | <0.0001 | 0.6                      | [0.50-0.71] | <0.0001 |
|                            | D2 | 0.6            | [0.48-0.75] | <0.0001 | 0.75                         | [0.55-1.02] | 0.063   | 0.44                     | [0.31-0.63] | <0.0001 |
| Chills or shivers          | D1 | 0.56           | [0.50-0.62] | <0.0001 | 0.58                         | [0.51-0.67] | <0.0001 | 0.5                      | [0.42-0.60] | <0.0001 |
|                            | D2 | 0.47           | [0.37-0.59] | <0.0001 | 0.46                         | [0.33-0.64] | <0.0001 | 0.47                     | [0.34-0.65] | <0.0001 |
| Hoarse voice               | D1 | 0.73           | [0.66-0.81] | <0.0001 | 0.77                         | [0.67-0.88] | <0.0001 | 0.66                     | [0.56-0.79] | <0.0001 |
|                            | D2 | 0.5            | [0.40-0.62] | <0.0001 | 0.53                         | [0.39-0.72] | <0.0001 | 0.44                     | [0.32-0.60] | <0.0001 |
| Skipped meals              | D1 | 0.55           | [0.49-0.61] | <0.0001 | 0.67                         | [0.58-0.78] | <0.0001 | 0.4                      | [0.33-0.48] | <0.0001 |
|                            | D2 | 0.52           | [0.41-0.66] | <0.0001 | 0.61                         | [0.44-0.85] | 0.0040  | 0.42                     | [0.29-0.61] | <0.0001 |
| Brain fog                  | D1 | 0.89           | [0.79-0.99] | 0.040   | 1.01                         | [0.88-1.17] | 0.86    | 0.68                     | [0.56-0.83] | <0.0001 |
|                            | D2 | 0.75           | [0.58-0.96] | 0.020   | 0.87                         | [0.62-1.22] | 0.42    | 0.63                     | [0.44-0.91] | 0.013   |
| Unusual muscle pains       | D1 | 0.73           | [0.65-0.82] | <0.0001 | 0.74                         | [0.64-0.85] | <0.0001 | 0.71                     | [0.58-0.88] | <0.0001 |
|                            | D2 | 0.7            | [0.54-0.91] | 0.0080  | 0.68                         | [0.48-0.95] | 0.024   | 0.69                     | [0.45-1.05] | 0.080   |
| Eye soreness               | D1 | 0.68           | [0.60-0.76] | <0.0001 | 0.71                         | [0.62-0.82] | <0.0001 | 0.62                     | [0.51-0.75] | <0.0001 |
|                            | D2 | 0.58           | [0.46-0.74] | <0.0001 | 0.6                          | [0.43-0.82] | 0.0010  | 0.57                     | [0.40-0.82] | 0.0020  |
| Diarrhoea                  | D1 | 0.52           | [0.46-0.59] | <0.0001 | 0.59                         | [0.51-0.70] | <0.0001 | 0.41                     | [0.33-0.51] | <0.0001 |
|                            | D2 | 0.41           | [0.31-0.54] | <0.0001 | 0.5                          | [0.35-0.74] | <0.0001 | 0.31                     | [0.20-0.47] | <0.0001 |
| Shortness of breath        | D1 | 0.96           | [0.85-1.09] | 0.56    | 1.15                         | [0.98-1.35] | 0.090   | 0.71                     | [0.57-0.88] | <0.0001 |
|                            | D2 | 0.72           | [0.54-0.96] | 0.027   | 0.85                         | [0.58-1.26] | 0.43    | 0.54                     | [0.35-0.86] | 0.0080  |
| Low mood                   | D1 | 0.64           | [0.57-0.73] | <0.0001 | 0.82                         | [0.70-0.96] | 0.010   | 0.44                     | [0.36-0.54] | <0.0001 |
|                            | D2 | 0.46           | [0.35-0.60] | <0.0001 | 0.68                         | [0.47-0.97] | 0.035   | 0.28                     | [0.18-0.43] | <0.0001 |

|                                |    |      |             |         |      |             |         |      |             |         |
|--------------------------------|----|------|-------------|---------|------|-------------|---------|------|-------------|---------|
| Chest pain                     | D1 | 0.9  | [0.80-1.02] | 0.10    | 1.01 | [0.86-1.17] | 0.93    | 0.72 | [0.58-0.89] | <0.0001 |
|                                | D2 | 0.74 | [0.56-0.99] | 0.041   | 0.94 | [0.65-1.38] | 0.76    | 0.56 | [0.36-0.86] | 0.0080  |
| Nausea                         | D1 | 0.57 | [0.50-0.65] | <0.0001 | 0.65 | [0.55-0.76] | <0.0001 | 0.45 | [0.36-0.56] | <0.0001 |
|                                | D2 | 0.65 | [0.48-0.86] | 0.0030  | 0.87 | [0.60-1.28] | 0.49    | 0.42 | [0.26-0.67] | <0.0001 |
| Tinnitus                       | D1 | 0.83 | [0.72-0.95] | 0.010   | 0.87 | [0.73-1.04] | 0.13    | 0.74 | [0.59-0.92] | 0.010   |
|                                | D2 | 0.59 | [0.44-0.79] | <0.0001 | 0.77 | [0.51-1.16] | 0.21    | 0.45 | [0.29-0.69] | <0.0001 |
| Abdominal pain                 | D1 | 0.71 | [0.62-0.82] | <0.0001 | 0.75 | [0.63-0.89] | <0.0001 | 0.65 | [0.51-0.82] | <0.0001 |
|                                | D2 | 0.6  | [0.44-0.81] | 0.0010  | 0.72 | [0.48-1.08] | 0.12    | 0.43 | [0.26-0.70] | 0.0010  |
| Earache                        | D1 | 0.94 | [0.81-1.09] | 0.41    | 1.06 | [0.89-1.26] | 0.51    | 0.69 | [0.52-0.90] | 0.010   |
|                                | D2 | 0.79 | [0.58-1.08] | 0.14    | 0.92 | [0.62-1.37] | 0.69    | 0.59 | [0.35-1.00] | 0.050   |
| Swollen glands                 | D1 | 1.03 | [0.89-1.19] | 0.72    | 1.1  | [0.93-1.31] | 0.27    | 0.86 | [0.66-1.12] | 0.26    |
|                                | D2 | 1.05 | [0.78-1.41] | 0.75    | 1.28 | [0.88-1.87] | 0.20    | 0.75 | [0.45-1.23] | 0.25    |
| Sensation of skin burning      | D1 | 0.48 | [0.41-0.56] | <0.0001 | 0.5  | [0.41-0.61] | <0.0001 | 0.42 | [0.31-0.56] | <0.0001 |
|                                | D2 | 0.46 | [0.32-0.65] | <0.0001 | 0.45 | [0.29-0.72] | 0.0010  | 0.43 | [0.25-0.75] | 0.0030  |
| Delirium or reported confusion | D1 | 0.74 | [0.63-0.86] | <0.0001 | 0.83 | [0.68-1.01] | 0.060   | 0.62 | [0.48-0.81] | <0.0001 |
|                                | D2 | 0.55 | [0.38-0.79] | 0.0010  | 0.72 | [0.45-1.17] | 0.19    | 0.36 | [0.20-0.63] | <0.0001 |
| Irregular heartbeat            | D1 | 0.68 | [0.57-0.80] | <0.0001 | 0.77 | [0.63-0.95] | 0.010   | 0.52 | [0.39-0.70] | <0.0001 |
|                                | D2 | 0.6  | [0.42-0.86] | 0.0060  | 0.72 | [0.44-1.19] | 0.20    | 0.47 | [0.27-0.81] | 0.0070  |

OR = Odds ratio; CI = Confidence interval

# Supplementary Figure 1. Inclusion process for cases and group controls

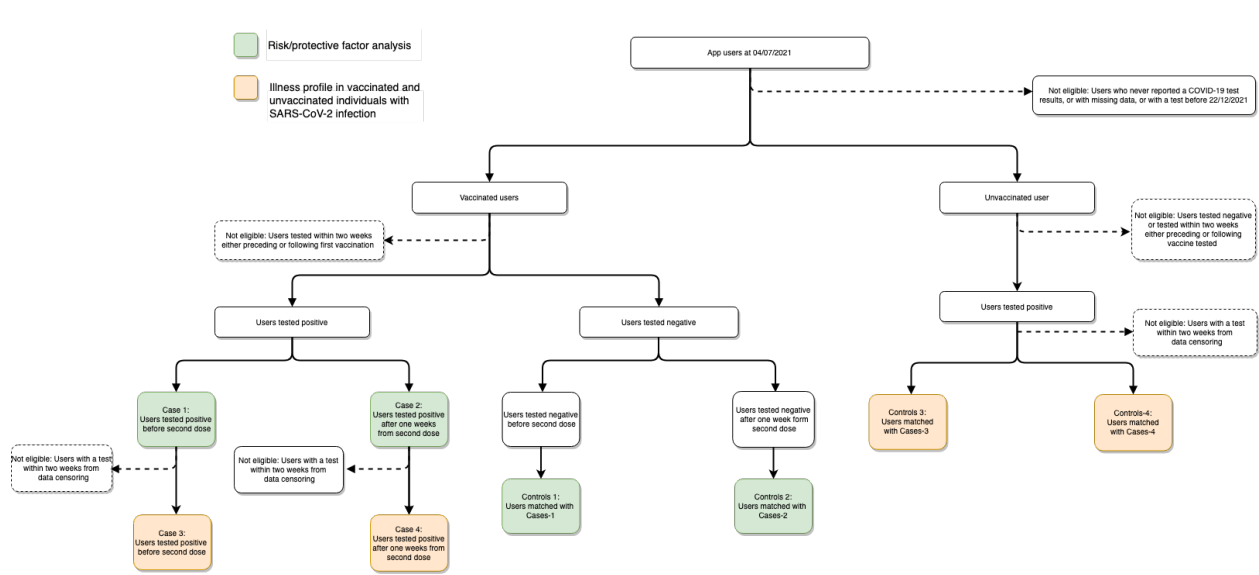

**Supplementary Figure 2. Odds ratio of receiving the vaccine for all users who have recorded at least one COVID-19 test since 8th of December 2020. Univariate analysis for a) age, body mass index (BMI), presence of at least one comorbidity, and frailty; and b) Index of Multiple Deprivation category and healthy lifestyle factors, adjusted for age, BMI, and sex and stratified by age group.**

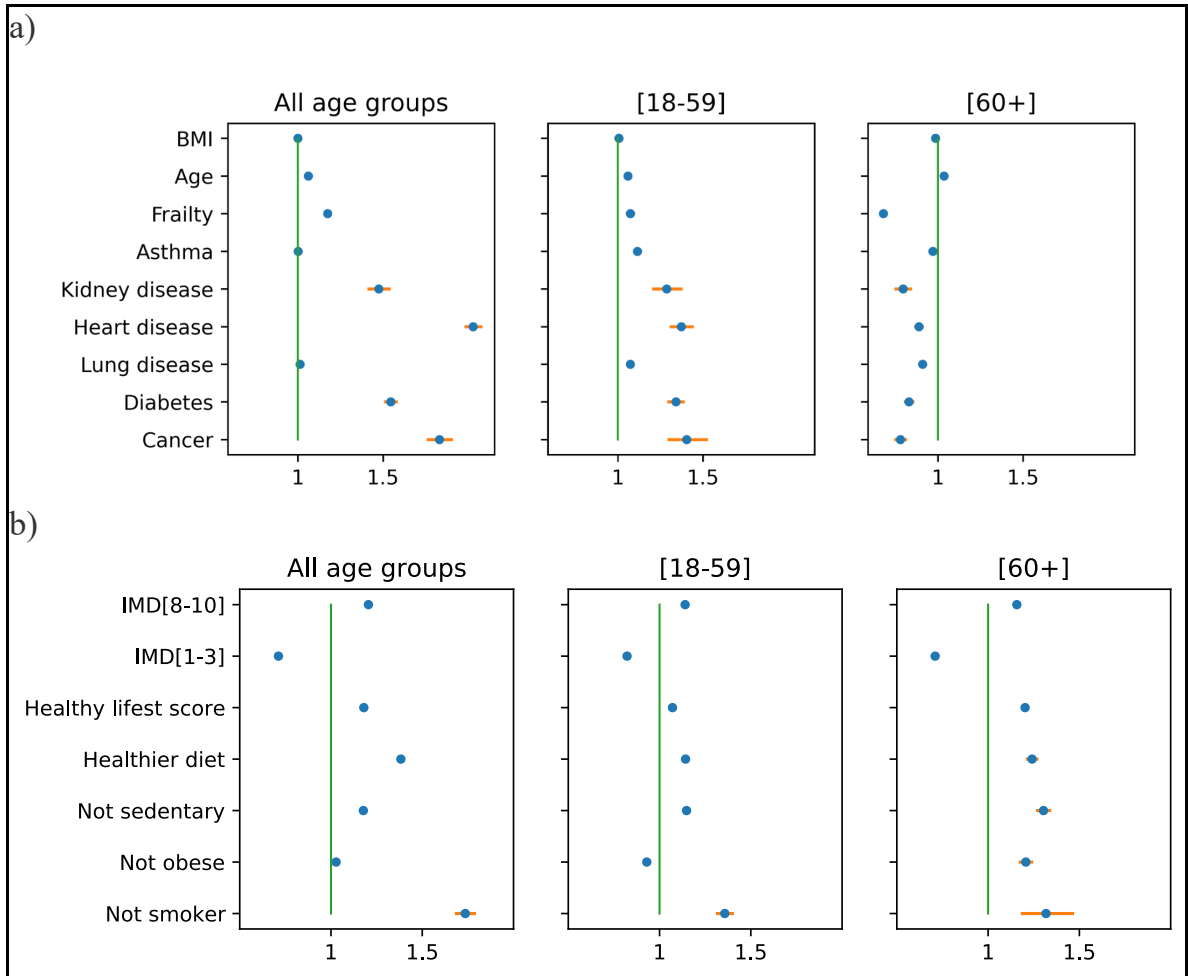

IMD = Index of Multiple Deprivation; IMD[1-3] = high deprivation, IMD[8-10] = low deprivation; reference category for IMD is the intermediate category IMD[4-7]



**Supplementary Figure 3. Histogram illustrating number of reported positive tests against number of days from first (blue bar) and second (orange bar) vaccine dose and for COVID-19 infection. NB these data are not adjusted for incidence of infection which changed over the same time period in the UK.<sup>46</sup>**

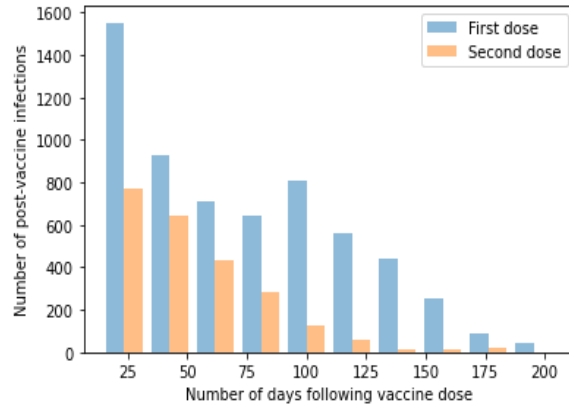

**Supplementary Figure 4. Comparison between the original univariate model adjusted for age, BMI, sex (blue) and the univariate model adjusted by age, BMI, sex, and mask-wearing (orange) for a) Cases-1 and b) Cases-2.**

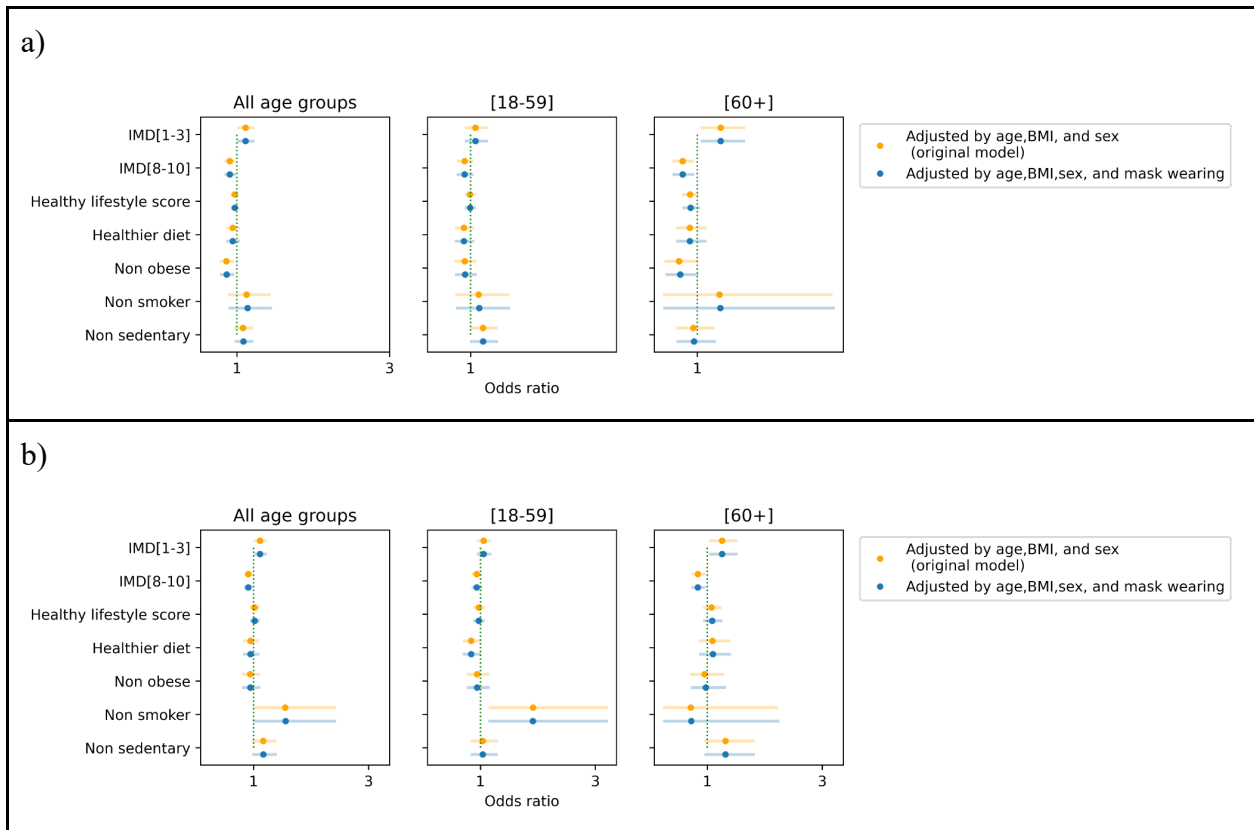

## Supplementary Methods

### Dietary Assessment

Diet was assessed using information obtained from an amended version of the Leeds Short Form Food Frequency Questionnaire that included 27 food items. Participants were asked how often on average they had consumed one portion of each food in a typical week during the month just prior (July 2020) to when they filled out the diet and lifestyle questionnaire. The responses had eight frequency categories ranging from “rarely or never” to “five or more times per day”. A healthy diet pattern was ascertained using the Diet Quality Score (DQS), a validated score for adherence to UK dietary guidelines.<sup>1,2</sup> The DQS was computed from five broad categories including fruits, vegetables, total fat, oily fish, and non-milk extrinsic sugars. Each component was scored from 1 (unhealthiest) to 3 (healthiest) points, with intermediate values scored proportionally. All component scores were summed to obtain a total score ranging from 5 (lowest diet quality) to 15 (highest) points. We defined a healthier diet pattern as a DQS in the top quartile of the score distribution (score $\geq$ 12 points). To generate the lifestyle scores, the participants received 1 point for each healthy lifestyle factor. The sum of these four scores together gave a healthy lifestyle score ranging from 0 to 4, with higher scores indicating a healthier lifestyle.<sup>2</sup>

1. Cleghorn CL, Harrison RA, Ransley JK, Wilkinson S, Thomas J, Cade JE. Can a dietary quality score derived from a short-form FFQ assess dietary quality in UK adult population surveys? *Public Health Nutr* 2016; **19**(16): 2915-23.

2. Merino J, Joshi AD, Nguyen L, Mazidi M, Graham M, Murray B, et al., Adherence to Healthy Diet and Risk and Severity of SARS-CoV-2 Infection: A Community Survey Study Within the COVID Symptom Study Application. American Society for Nutrition, June 7-10, 2021.
